# Supplementary material
Source: publisher figshare collection journal article supplement (https://gsajournals.figshare.com/articles/dataset/_/20752723)

**A**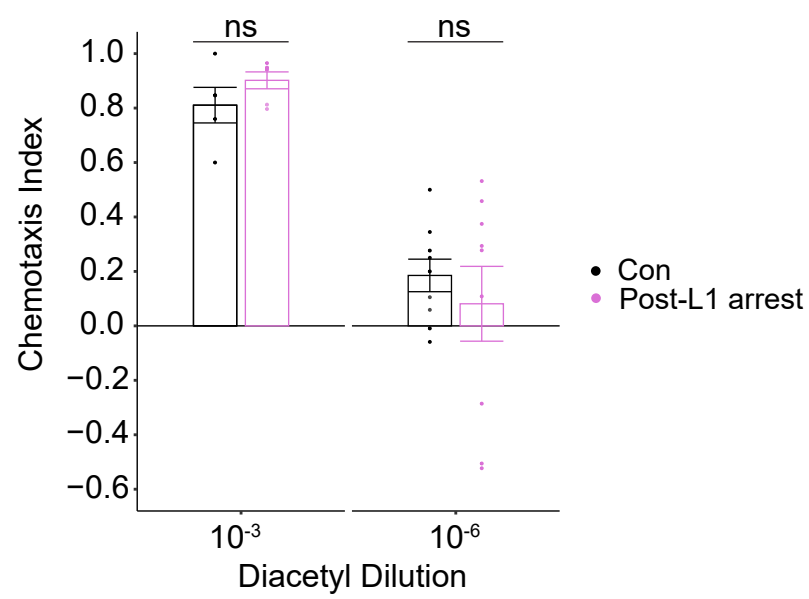**B**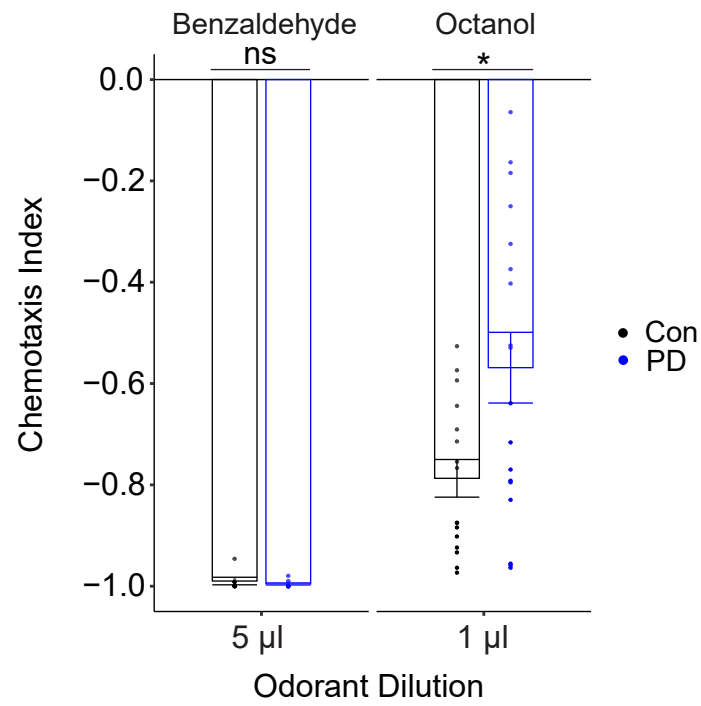**C**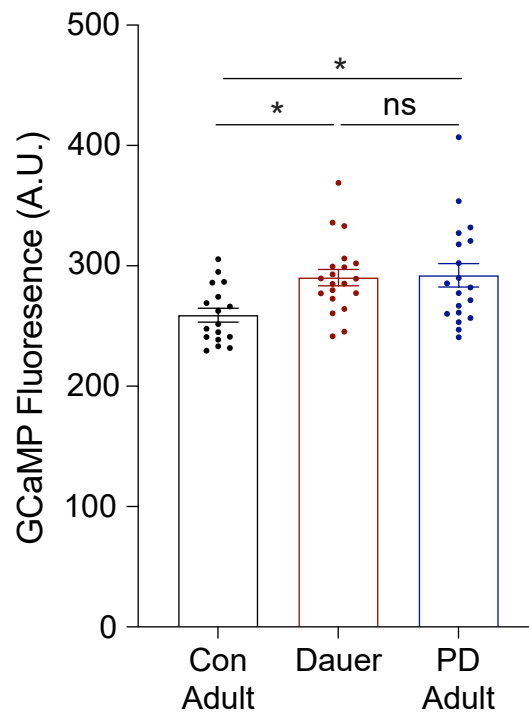

Supplement: Supplementary file 1 [file 1]

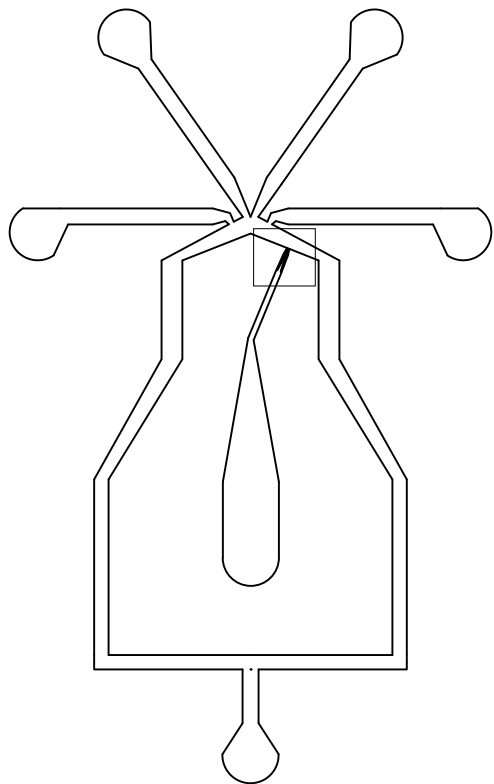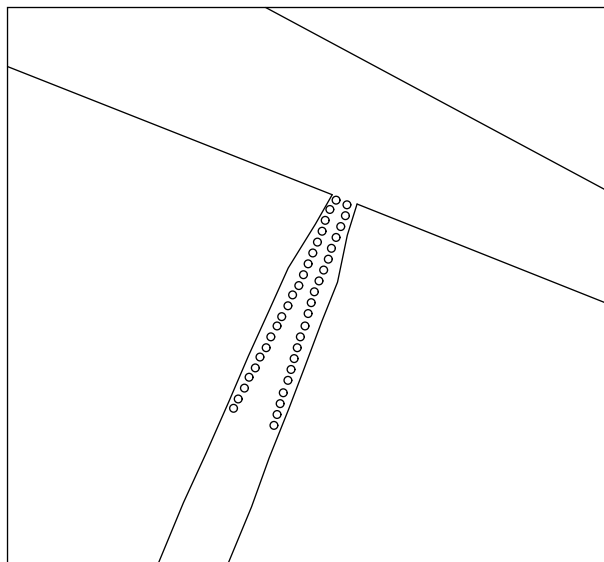

Supplement: Supplementary file 2 [file 1]

**A**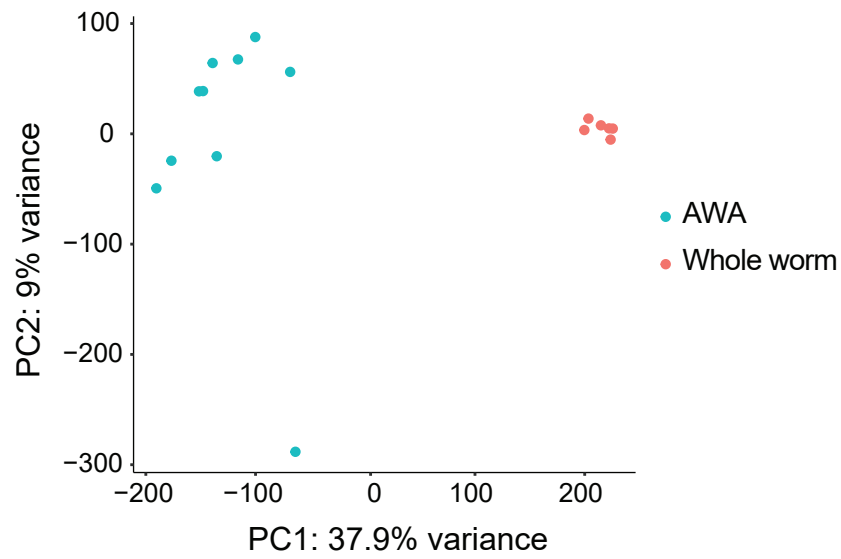**B**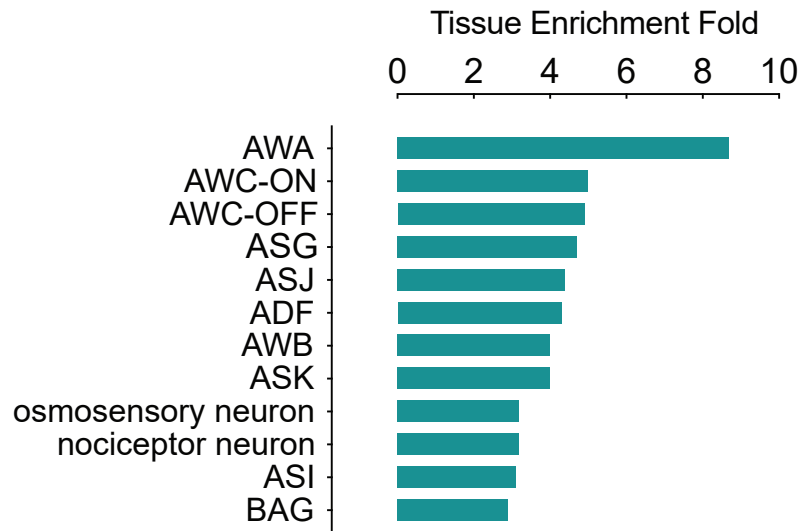**C**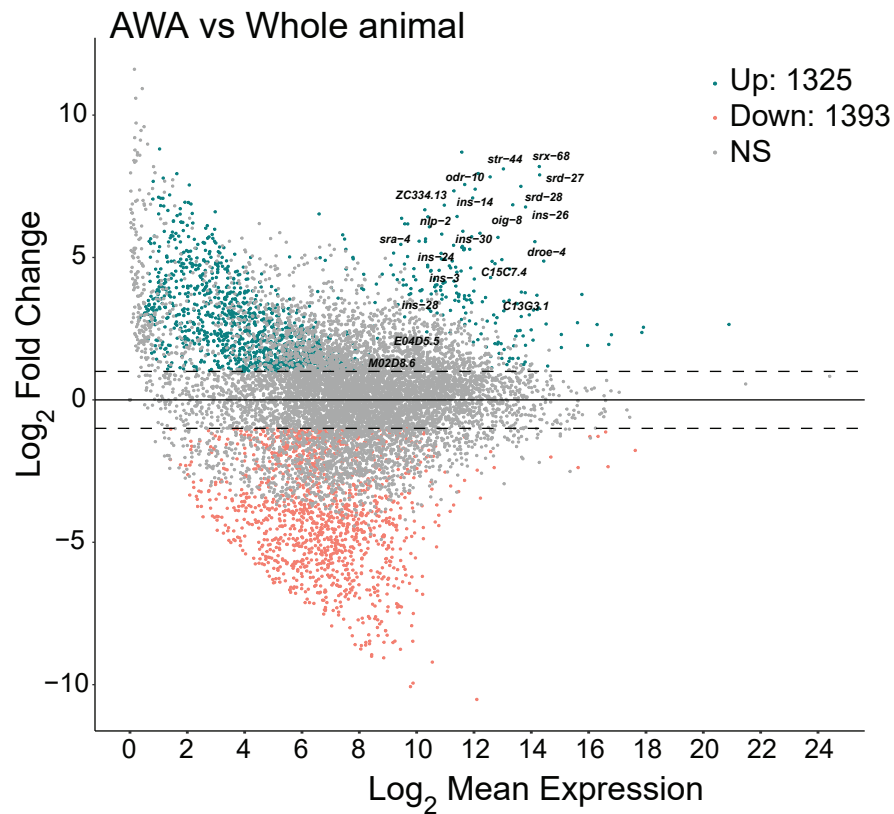

Supplement: Supplementary file 3 [file 1]

**A**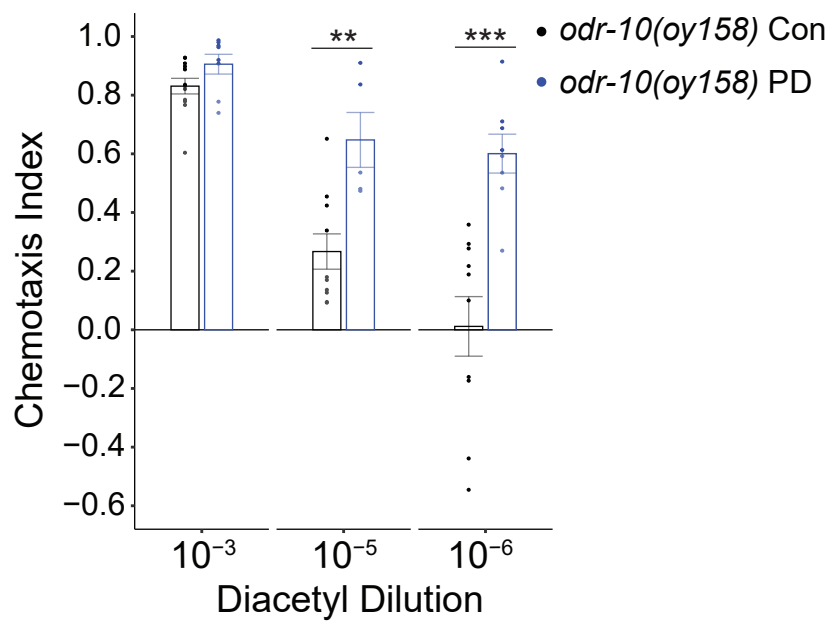**B**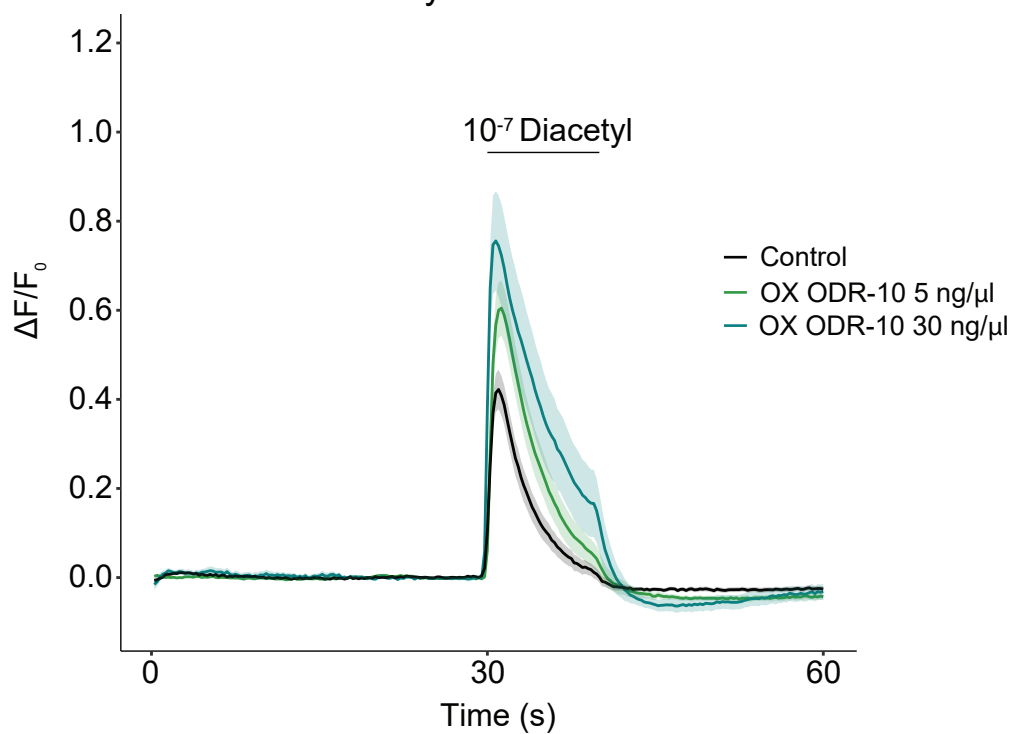**C**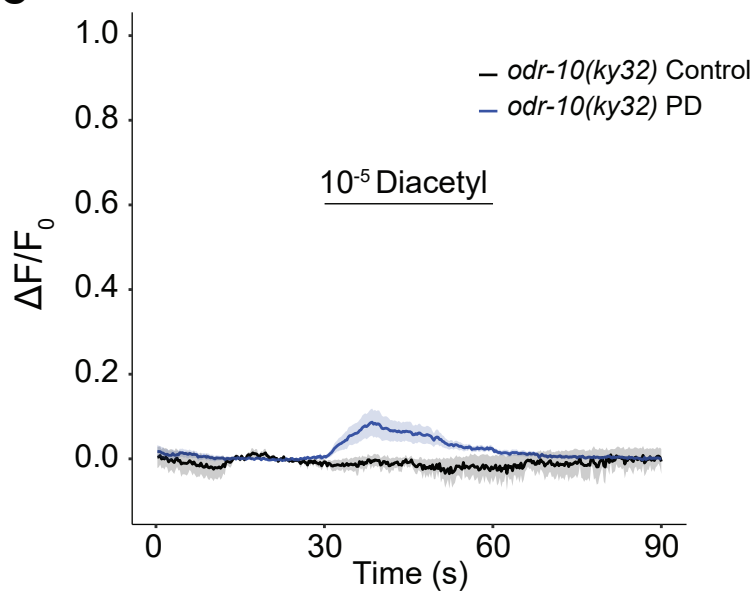**D**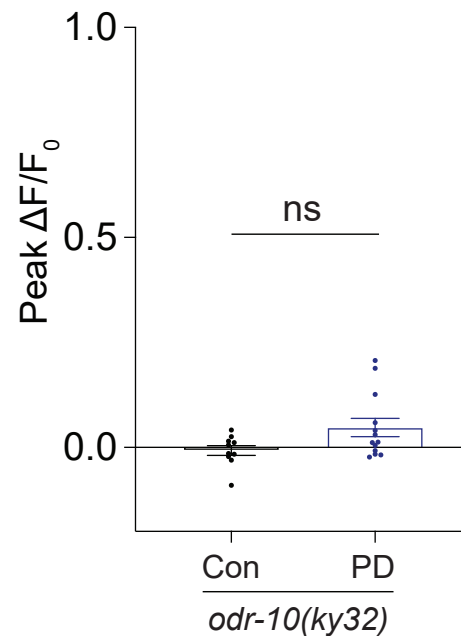

Supplement: Supplementary file 4 [file 1]
